# Supplementary material
Source: PubMed Central journal article supplement (PMC4804716)
Supplement: NIHMS703136-supplement-Supp_MaterialS1.pdf [file NIHMS703136-supplement-Supp_MaterialS1.pdf]

## Supplementary material

### Synthesis and evaluation of 1,4-naphthoquinone ether derivatives as *SmTGR* inhibitors and new antischistosomal drugs

#### Authors' names

Laure Johann,<sup>1</sup> Didier Belorgey,<sup>1</sup> Hsin-Hung Huang,<sup>2</sup> Latasha Day,<sup>2</sup> Matthieu Chessé,<sup>1</sup> Katja Becker,<sup>3</sup> David L. Williams,<sup>2</sup> and Elisabeth Davioud-Charvet\*,<sup>1</sup>

#### Addresses

<sup>1</sup> UMR 7509 CNRS University of Strasbourg, European School of Chemistry, Polymers and Materials (ECPM), 25 Rue Becquerel, F-67087 Strasbourg, France.

<sup>2</sup> Department of Immunology/Microbiology, Rush University Medical Center, 1735 West Harrison Street, Chicago, IL 60612, USA.

<sup>3</sup> Biochemistry and Molecular Biology, Interdisciplinary Research Center (IFZ), Justus Liebig University of Giessen, Heinrich-Buff-Ring 26-32, D-35392 Giessen, Germany.

#### \*Corresponding author

Elisabeth Davioud-Charvet, European School of Chemistry, Polymers and Materials (ECPM), University of Strasbourg, UMR CNRS 7509, 25 Rue Becquerel, F-67087 Strasbourg, France. Tel: (+33) 368852620; Fax: (+33) 368852742; E-mail: [elisabeth.davioud@unistra.fr](mailto:elisabeth.davioud@unistra.fr)

#### Running title

Specific thioredoxin-glutathione reductase inhibitors

**Fig. S1.** Changes of the Absorption Spectra of the difluoromethylmenadione upon glutathione addition (Panels A-D).

(A) Absorption spectrophotometric variation and (B) Absorbance at 440 nm measured in the time course of the glutathionylation of the difluoromenadione. Solvent: 200 $\mu$ L MeCN + 265  $\mu$ L NH<sub>4</sub>OH buffer at pH 7.5; [difluoromenadione] =  $2 \times 10^{-4}$  M (10  $\mu$ L stock at 10 mM); [GSH] =  $10^{-3}$  M (25  $\mu$ L stock at 20 mM);  $T = 25^\circ\text{C}$ . (1)  $t = 0$  s; (2)  $t = 600$  s.

(C) Electronic absorption spectra measured for the difluoromenadione and its glutathione adducts.

(D) Distribution diagram of the difluoromenadione and its products as a function of time during the glutathionylation reaction. Solvent: 200 $\mu$ L MeCN + 265  $\mu$ L NH<sub>4</sub>OH buffer at pH 7.5; [difluoromenadione] =  $2 \times 10^{-4}$  M (10  $\mu$ L stock at 10 mM); [GSH] =  $10^{-3}$  M (25  $\mu$ L stock at 20 mM);  $T = 25^\circ\text{C}$ .

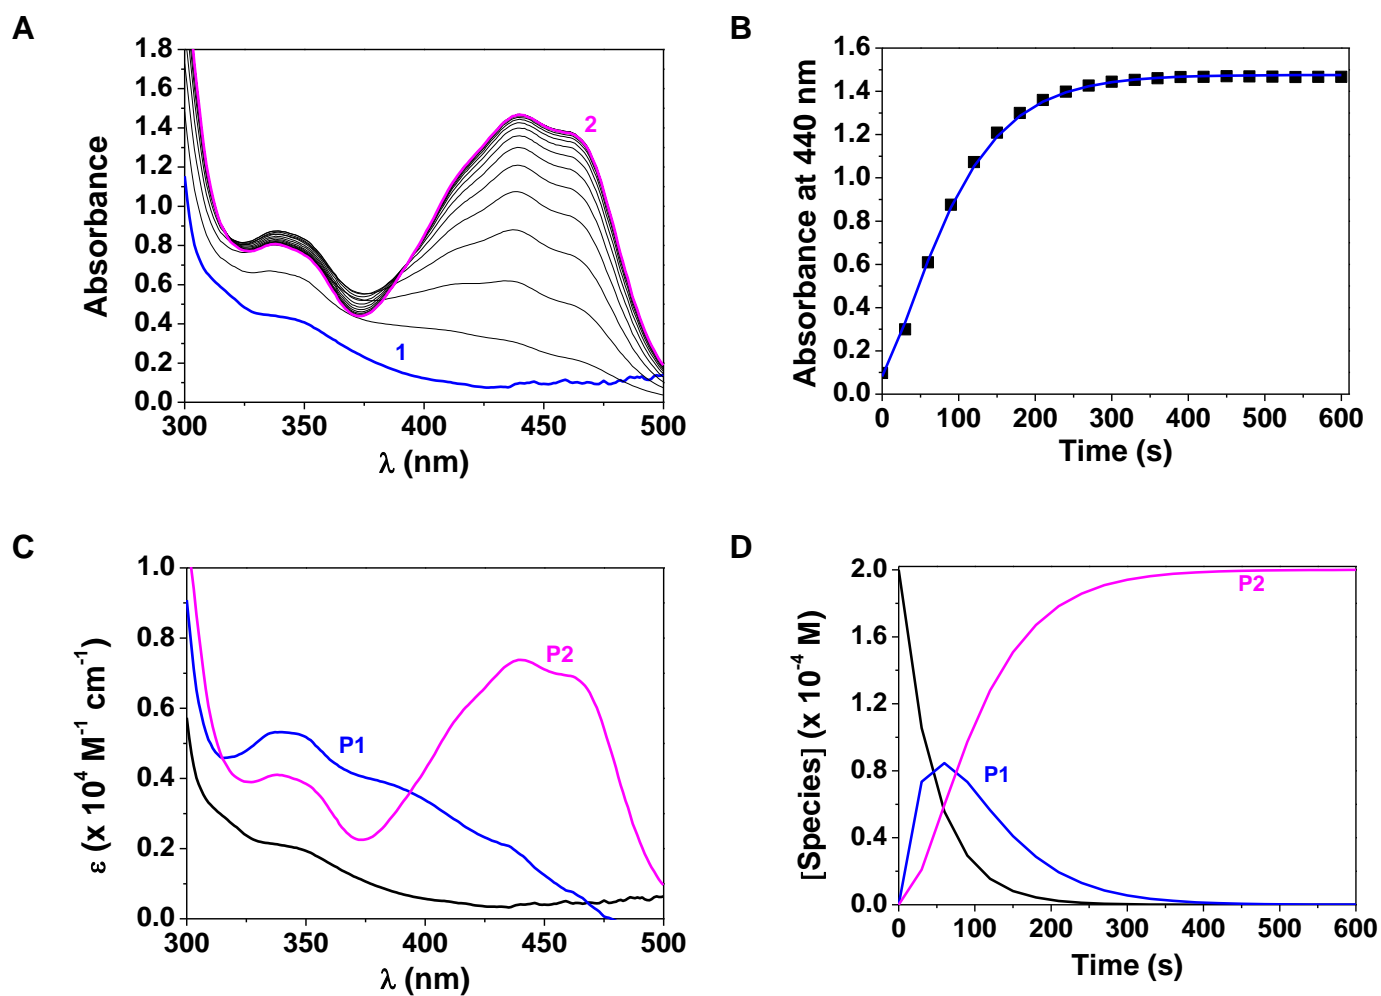

**Fig. S2.** Changes of the Absorption Spectra of the difluoromethyl derivative **8** upon glutathione addition (Panels A-D).

(A) Absorption spectrophotometric variation and (B) Absorbance at 350 nm measured in the time course of the glutathionylation of compound **8**. Solvent: 200  $\mu$ L MeCN + 265  $\mu$ L NH<sub>4</sub>OH buffer at pH 7.5; [**8**] =  $2 \times 10^{-4}$  M (10  $\mu$ L stock at 10 mM); [GSH] =  $10^{-3}$  M (25  $\mu$ L stock at 20 mM);  $T = 25^\circ\text{C}$ . (1)  $t = 0$  s; (2)  $t = 1800$  s.

(C) Electronic absorption spectra measured for compound **8** and its glutathione adducts and (D) Distribution diagram of compound **8** and its products as a function of time during the glutathionylation reaction. Solvent: 200  $\mu$ L MeCN + 265  $\mu$ L NH<sub>4</sub>OH buffer at pH 7.5; [**8**] =  $2 \times 10^{-4}$  M (10  $\mu$ L stock at 10 mM); [GSH] =  $10^{-3}$  M (25  $\mu$ L stock at 20 mM);  $T = 25^\circ\text{C}$ .

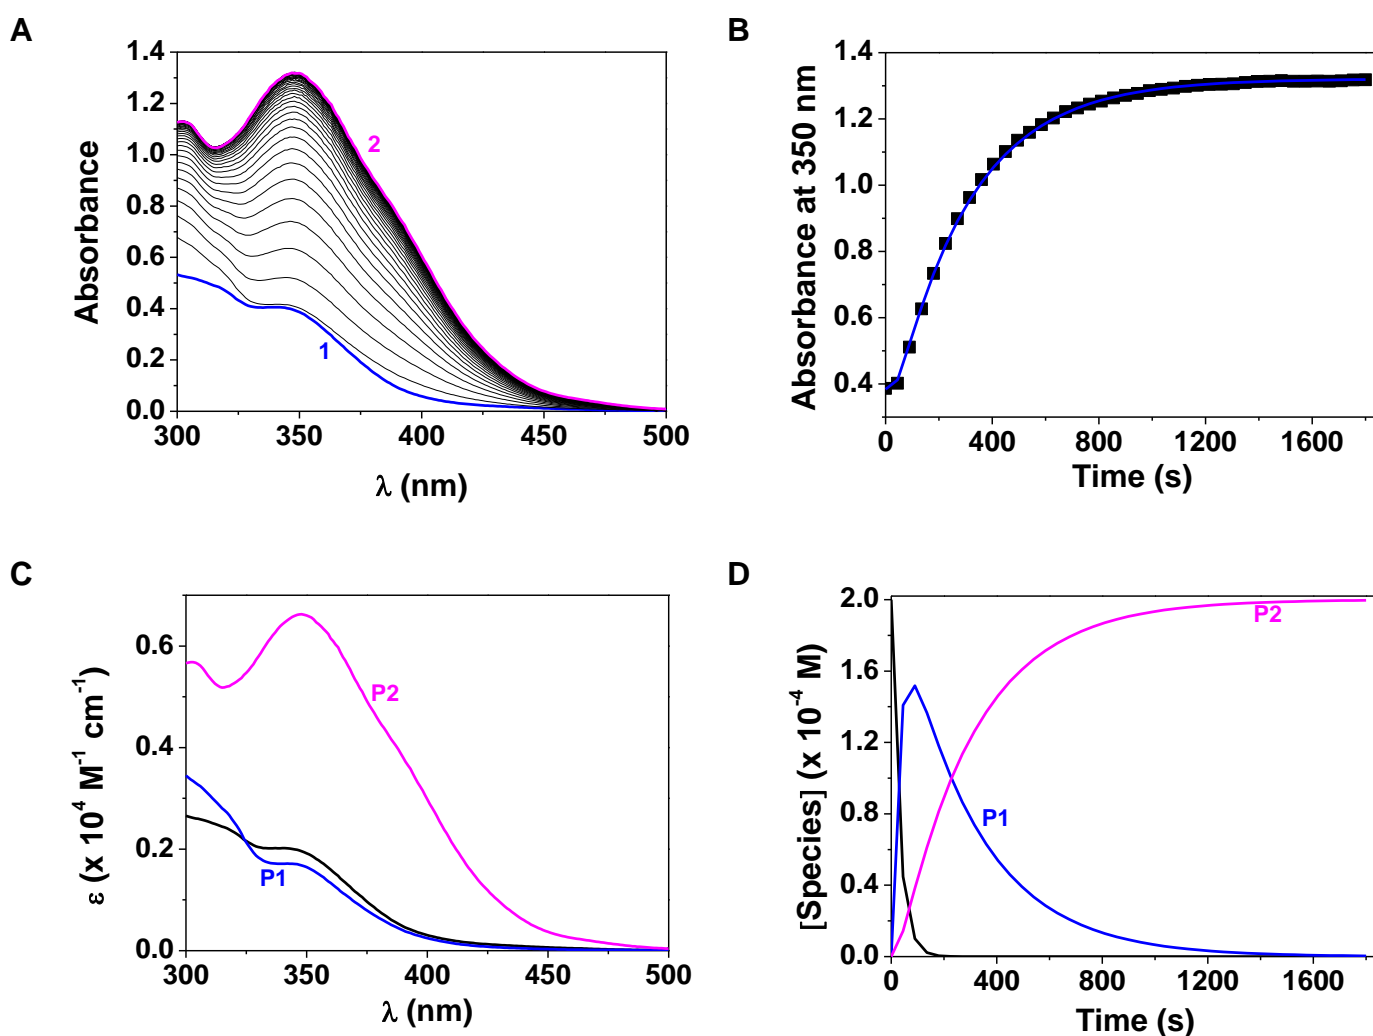

## **LC–MS analysis of the difluoromethylmenadiones–glutathione conjugates**

After the sample was dissolved in the matrix solution (200  $\mu$ l MeCN, 10 $\mu$ l of naphthoquinone, 265  $\mu$ l of buffer  $\text{NH}_4\text{OH}$  and the addition of 25  $\mu$ l GSH and to stop the reaction 10  $\mu$ l of formic acid solution 50%), 5  $\mu$ l was directly injected onto a Thermo Scientific Hypersil GOLD column (50 $\times$ 2.1 mm, 1.9  $\mu$ m), in an Accela 600 liquid chromatography apparatus. The chromatogram was starting at a flow of 0.5 ml/min with a starting point (i) at 5% of buffer B (MeCN with 0.2% formic acid) and 95% of buffer A (water with 0.2% formic acid). From here (ii) a gradient was developed from 0 min to 5 min at 95% of buffer B and 5% of buffer A), (iii) from 5 to 8 min with an elution phase at the same condition, i.e. 95% of buffer B and 5% of buffer A, followed by a return to equilibration at the starting conditions on 6 min at 5% of buffer B and 95% of buffer A. A 50:50 % split was applied dividing the flow in two parts, one for the mass detector and the other in the photodiode array. The liquid chromatograph was coupled to a Thermo MSQ mass spectrometer (Thermo scientific) operated under a switching positive ionization mode and negative ionization mode with the following source settings: electro-spray source at 350  $^{\circ}\text{C}$  under  $\text{N}_2$  nebulisation at 5 bar. The cone voltage applied 75 V in positive mode with a scan time of 0.5 sec and -30 V in negative mode with a scan time of 0.5 sec. Data acquisition was performed in full scan mode monitoring from 100 Dalton to 1000 Dalton. The photodiode array is scanning from 200 to 600 nm. Wavelengths extractions were studied at 254 nm and 350 nm. Xcalibur software (Thermo version 2.1) was used for data registration.

**Figure S3. UV-Vis chromatograms and LC–MS traces After analysis of the glutathionylation reaction mixtures for difluoromethylmenadiones–GSH conjugate formation.**

The data presented in the following section show 4 chromatograms (upper part): photodiode array (PDA) detection from 200 to 600 nm; UV trace at 254 nm; UV trace at 350 nm; and then TIC ESI (Total Ion Count in Electrospray at the specified tension) in a full scan from 100 to 1000 Dalton. An extracted view of each chromatogram is presented with a time range of 0 to 7 min. Noteworthy is to mention the time shift of 0.1 min between the UV detection and the mass spectra detection caused by the split system. The mass spectra of the compounds are shown in the lower part (except for the pure difluoromethylmenadione alone for which we could not detect the  $m/z$  signal at the compound concentration used). Both negative and positive ESI spectra were recorded using the following parameters: “-p ESI Corona sid = 30” meaning for negative ESI at the tension of 30V; “+p ESI Corona sid = 75” meaning for positive ESI at the tension of 75 V. Only one spectrum was shown according to the experiment.

## difluoromethylmenadione alone

D:\MSQ\...2015\19mars15\BJ531

3/19/2015 7:24:01 PM

RT: 0.00 - 7.00

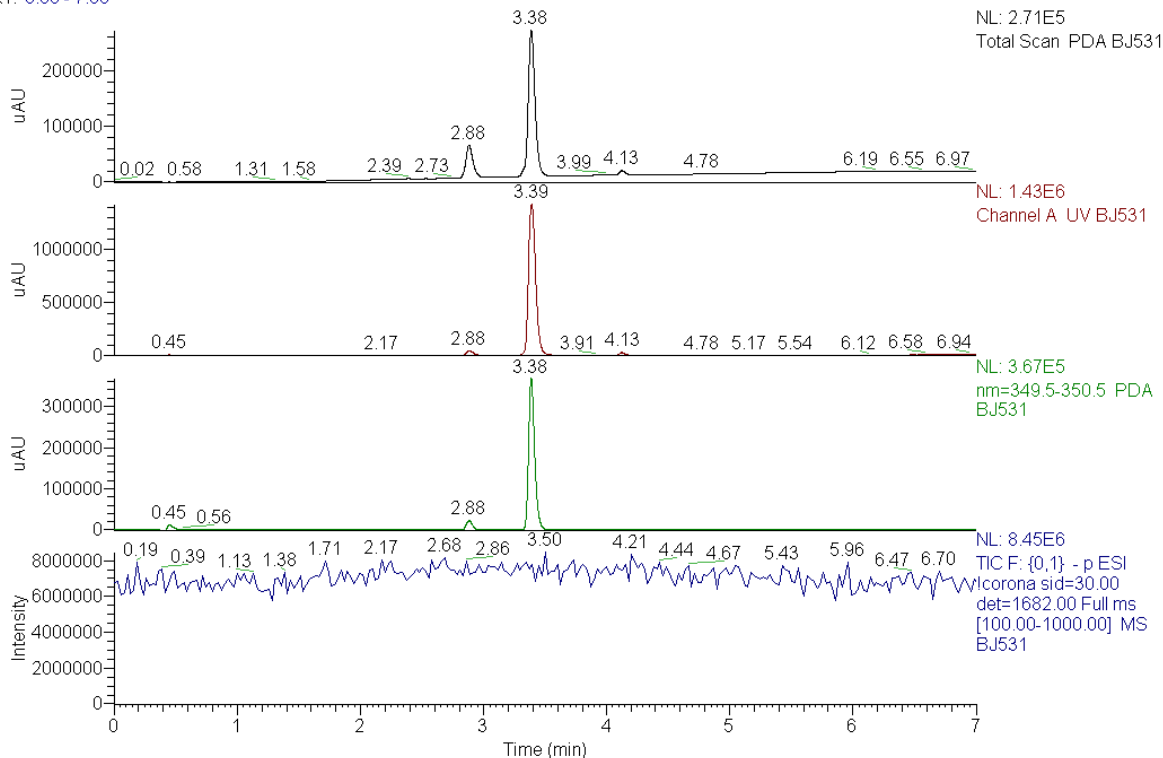

## difluoromethylmenadione glutathionylation

D:\MSQ\...2015\19mars15\BJ531-r

3/19/2015 5:40:55 PM

RT: 0.00 - 7.00

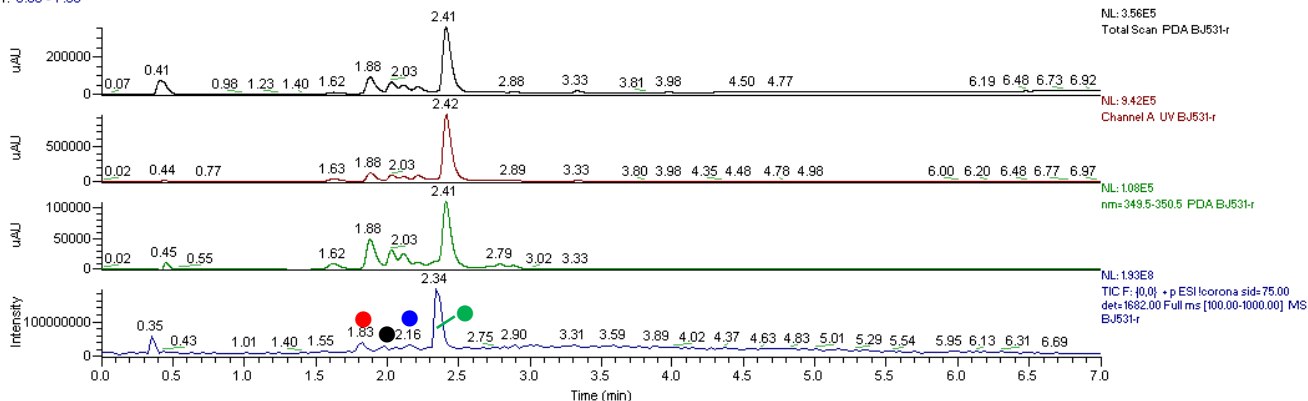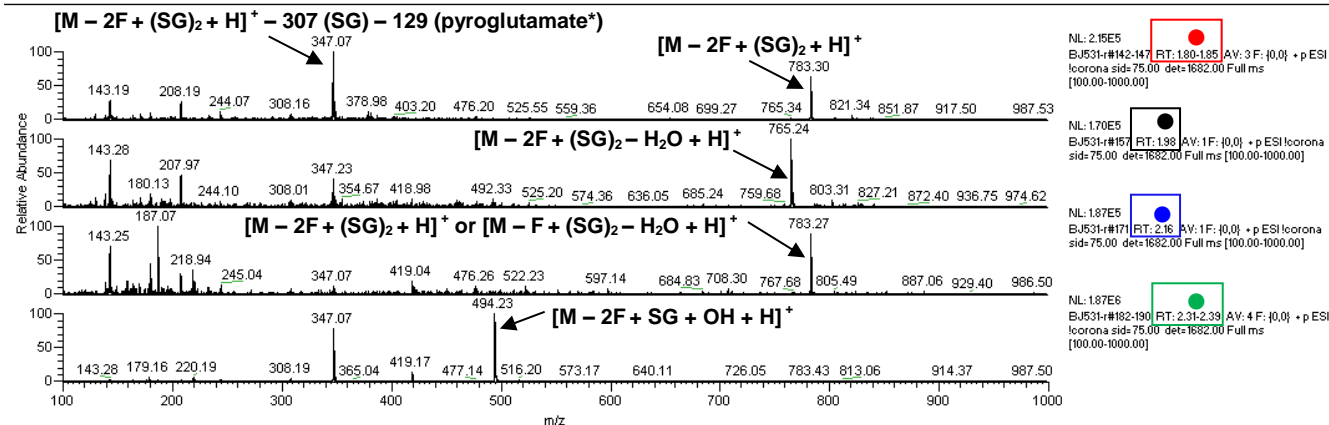

\* the dissociation of the molecular ions of GSH adducts yielded fragment ions involving the loss of pyroglutamate (129 Da), which are typical of many GSH conjugates.

## Compound 8 alone

D:\MSQ\...2015\19mars15\BJ731

3/19/2015 7:09:15 PM

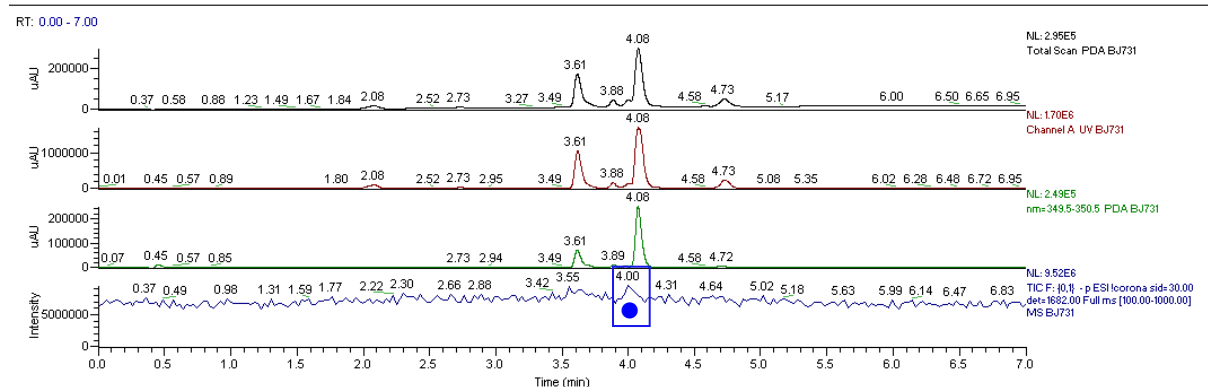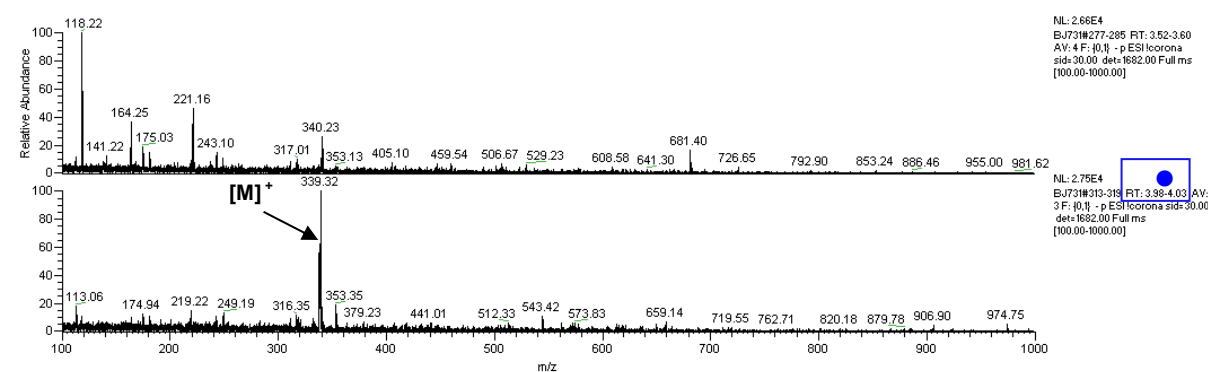

## Compound 8 glutathionylation

D:\MSQ\...2015\19mars15\BJ731-r

3/19/2015 5:26:09 PM

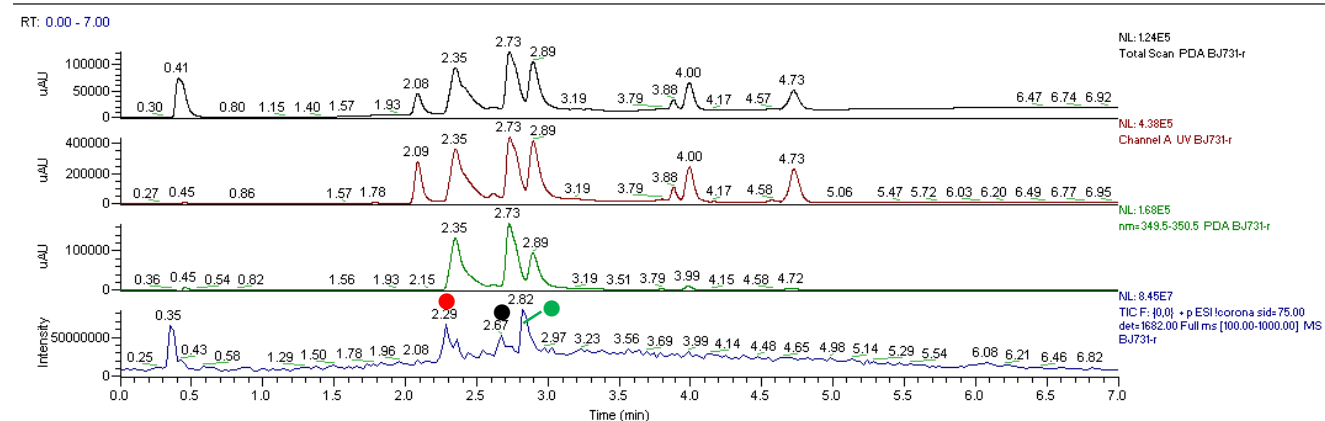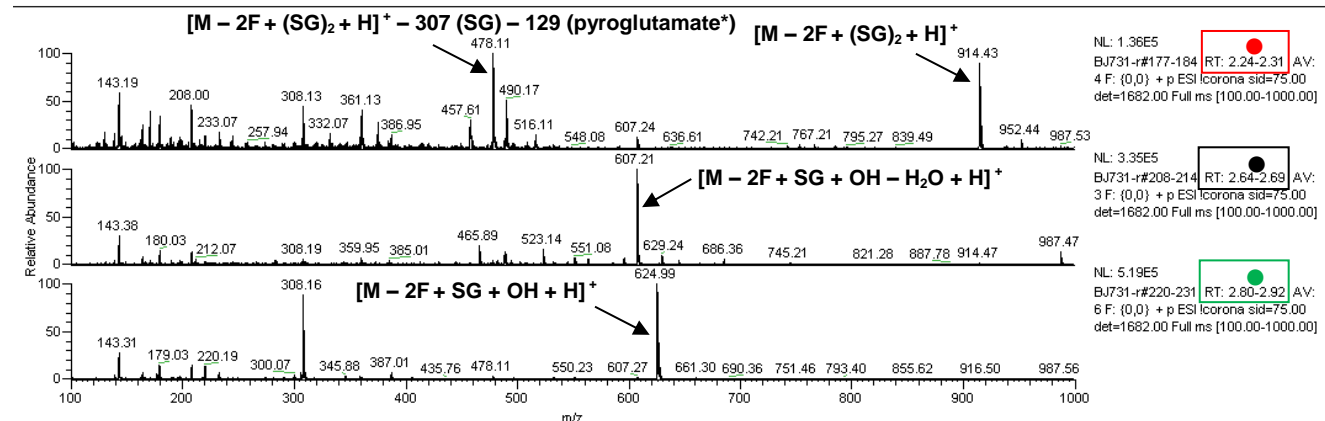

\* the dissociation of the molecular ions of GSH adducts yielded fragment ions involving the loss of pyroglutamate (129 Da), which are typical of many GSH conjugates.

## Compound 9 alone

D:\MSQ\...2015\19mars15\BJ735-7

3/19/2015 6:54:33 PM

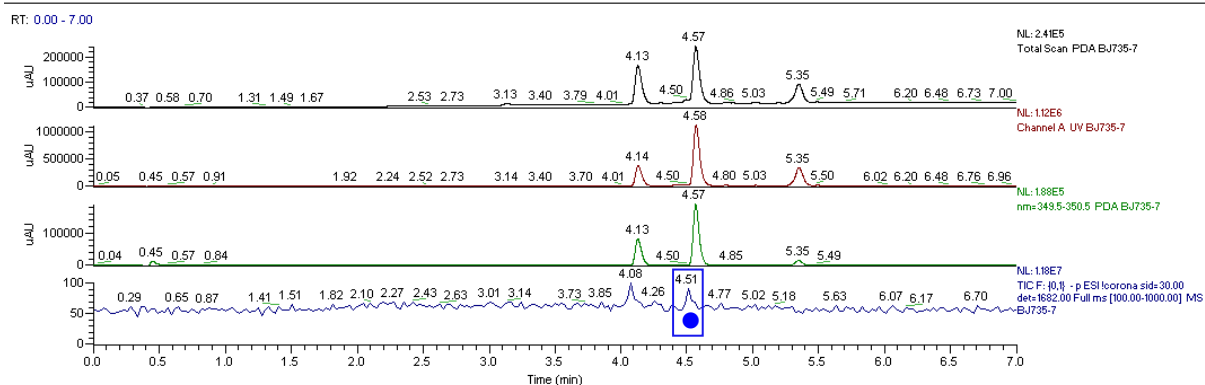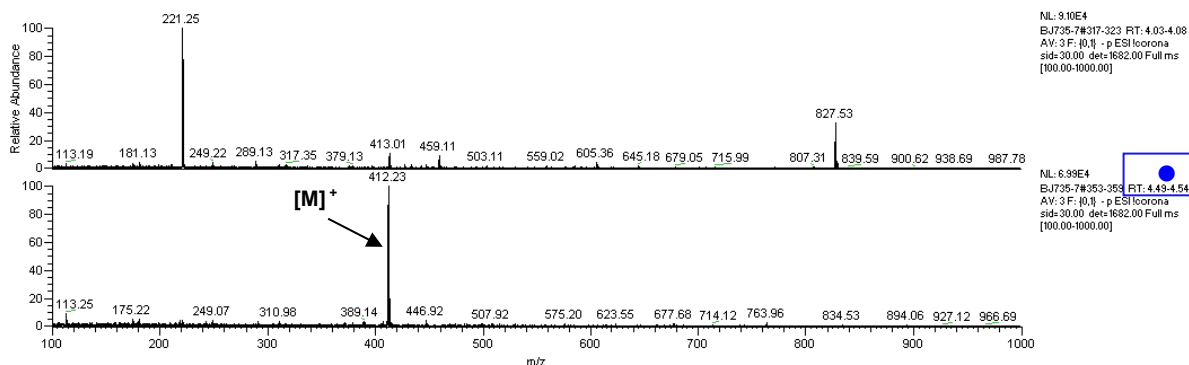

## Compound 9 glutathionylation

D:\MSQ\...2015\19mars15\BJ735-7r

3/19/2015 5:11:22 PM

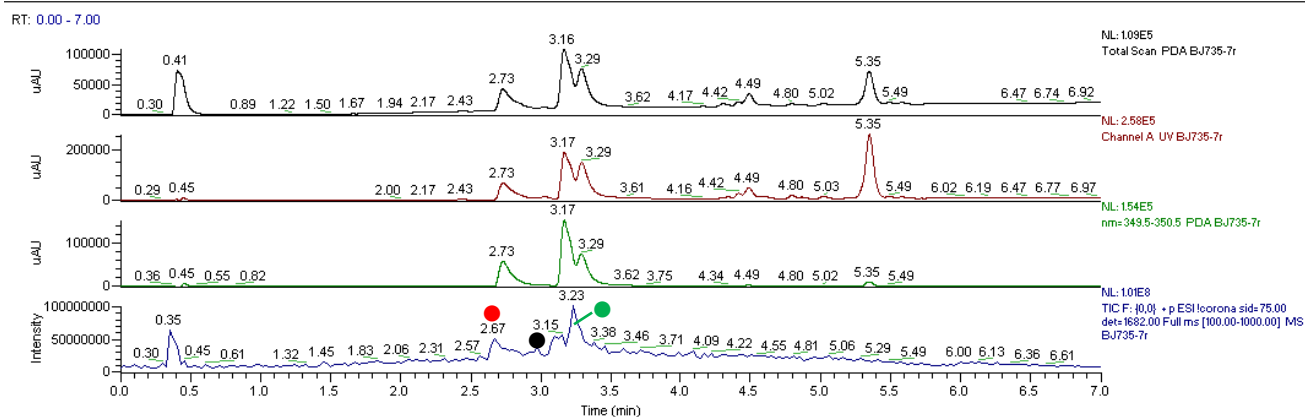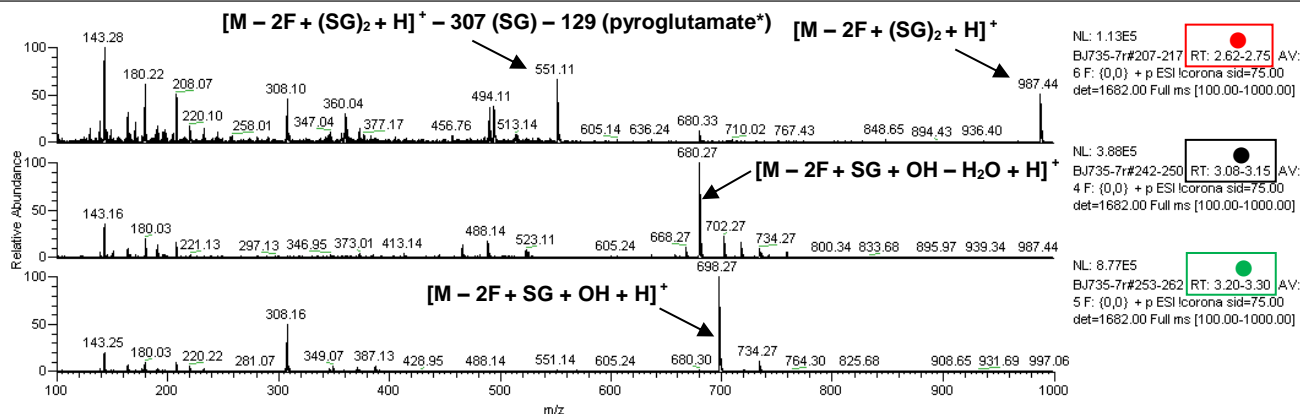

\* the dissociation of the molecular ions of GSH adducts yielded fragment ions involving the loss of pyroglutamate (129 Da), which are typical of many GSH conjugates.



**Table S1. Proposed chemical structures of difluoromethylmenadiones–glutathione adducts analyzed from the glutathionylation reaction mixtures by LC-MS analysis.**

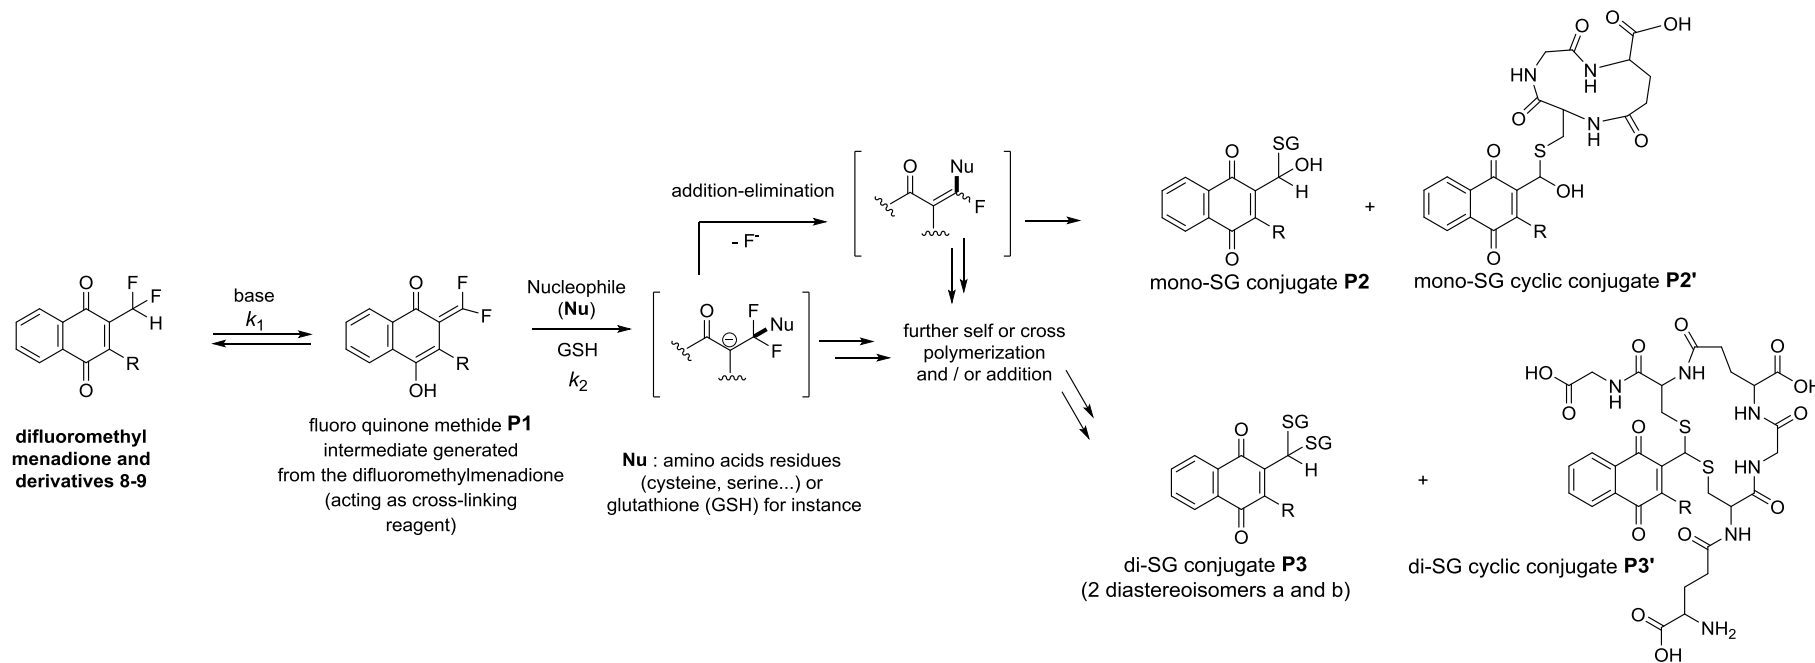

| 2-difluoromethyl-3-H or 3-phenoxyethyl menadione | LC-MS trace (retention time in min) | observed $m/z$ $[M + H]^+$ (mass fragments) | predicted molecular chemical formula                            | proposed structure                                      |
|--------------------------------------------------|-------------------------------------|---------------------------------------------|-----------------------------------------------------------------|---------------------------------------------------------|
| difluoromethylmenadione                          | ● (1.83)                            | 783.3 (347.1)                               | $C_{31}H_{36}N_6O_{14}S_2$<br>or<br>$C_{31}H_{35}FN_6O_{13}S_2$ | <p>di-SG conjugate P3 (a or b) or/and regio-adducts</p> |

|  |                   |               |                                                                 |                                                                |
|--|-------------------|---------------|-----------------------------------------------------------------|----------------------------------------------------------------|
|  | ● (1.98)          | 765.2 (347.2) | $C_{31}H_{36}N_6O_{13}S_2$                                      | <p>di-SG cyclic conjugate <b>P3'</b></p>                       |
|  | ● (2.16)          | 783.3 (187.1) | $C_{31}H_{38}N_6O_{14}S_2$<br>or<br>$C_{31}H_{35}FN_6O_{13}S_2$ | <p>di-SG conjugate <b>P3</b> (a or b) or/and regio-adducts</p> |
|  | ● (2.35)<br>major | 494.2 (347.1) | $C_{21}H_{23}N_3O_9S$                                           | <p>mono-SG conjugate <b>P2</b></p>                             |

|            |                   |                                       |                               |                                                                                                                                 |
|------------|-------------------|---------------------------------------|-------------------------------|---------------------------------------------------------------------------------------------------------------------------------|
| Compound 8 | ● (2.28)          | 914.4 (607.2 ; 516.1 ; 490.2 ; 478.1) | $C_{39}H_{43}N_7O_{15}S_2$    | 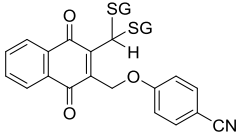 <p>di-SG conjugate <b>P3</b> (a or b)</p>   |
|            | ● (2.62)          | 607.2 (523.1 ; 465.9)                 | $C_{29}H_{26}N_4O_9S$         |  <p>mono-SG cyclic conjugate <b>P2'</b></p>  |
|            | ● (2.88)<br>major | 625.0 (308.2)                         | $C_{29}H_{28}FN_4O_{10}S$     |  <p>mono-SG conjugate <b>P2</b></p>          |
| Compound 9 | ● (2.69)          | 987.4 (511.1; 494.1)                  | $C_{40}H_{45}F_3N_6O_{16}S_2$ |  <p>di-SG conjugate <b>P3</b> (a or b)</p>   |
|            | ● (3.12)          | 680.3(488.1; 523.1)                   | $C_{30}H_{28}F_3N_3O_{10}S$   |  <p>mono-SG cyclic conjugate <b>P2'</b></p> |
|            | ● (3.25)<br>major | 698.3 (308.2)                         | $C_{30}H_{30}F_3N_3O_{11}S$   |  <p>mono-SG conjugate <b>P2</b></p>        |

**Table S2.** IC<sub>50</sub> values for M<sub>5</sub> derivatives IC<sub>50</sub> Values of 3-phenoxyethyl menadiones and their difluoromethylenedione derivatives as cytotoxic agents against human lung fibroblasts MRC-5 *in vitro*.

| Compound | 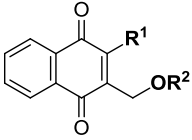 |                                                                                     | IC <sub>50</sub> (μM) in MRC-5 assay |
|----------|-----------------------------------------------------------------------------------|-------------------------------------------------------------------------------------|--------------------------------------|
|          | R <sup>1</sup>                                                                    | R <sup>2</sup>                                                                      |                                      |
| 1        | - Me                                                                              |    | 6.6                                  |
| 2        | - Me                                                                              |    | 31.1                                 |
| 3        | - Me                                                                              |    | 25.6                                 |
| 4        | - Me                                                                              |   | 29.8                                 |
| 5        | - Me                                                                              |  | 30.6                                 |
| 6        | - Me                                                                              |  | 21.7                                 |
| 7        | - Me                                                                              |  | 26.6                                 |
| 8        | - CHF <sub>2</sub>                                                                |  | 6.7                                  |
| 9        | - CHF <sub>2</sub>                                                                |  | 11.2                                 |
